# Supplementary material for: It was important because we won: Self-serving biases shape the relationship between future thinking and remembering of elections
Source: Research Square preprint supplement (doi:10.21203/rs.3.rs-7658705/v1), 2025-10-17
Supplement: Supplementary file 1 [file 156fd4bc8090ab1c14040b83.pdf]

**Supplementary Material:****It was important because we won: Self-serving biases shape the relationship between future thinking and remembering of elections****Supplementary Note 1: Background on the studied elections**

Elections for EU parliament are often difficult to grasp for voters, who in many cases do not know what exactly they are voting for. Nevertheless, turnout in the 2024 election in Germany was the second highest ever (64.7%). The results broadly confirmed the low polls for the sitting coalition with poor results for the Social Democratic SPD and the Greens (the latter being the most popular party in our sample), while the liberal FDP had a low but somewhat better than expected result. On the other hand, the conservative Christian Democrats (CDU) and far-right AfD were regarded as the election winners. In the aftermath, a discussion ensued about the continued electoral success of the far right, likely contributing to a negative view of the leftist sample on the election.

In the UK, sitting prime minister Rishi Sunak unexpectedly called an election, at a point where his Conservative Party was far behind the Labour party in the polls. The race was believed to be decided from the beginning after the Conservatives had been in power for 14 years, going through five prime ministers during this time. The results confirmed the polling, and the Labour party obtained a large majority in the House of Commons. The Conservatives lost a high number of seats, including some high-profile members of parliament such as former Prime Minister Liz Truss.

The race in the US, on the other hand, was much more uncertain. After the replacement of Biden with Harris on the Democratic ticket, polls were tight, and few experts were ready to make a prediction. In the end, Donald Trump won overwhelmingly, with all seven swing states in his favour and leading over Harris in the popular vote.

**Supplementary Note 2: Full outputs of all reported models**

As the manuscript only includes  $\beta$  and  $p$ -values, the full outputs of all reported models are listed below. For the direct comparisons between future thinking and remembering, the “Time” variable refers to levels of a given variable after the election compared to before. In all tables, the controlled-for covariates are listed under the horizontal line. Political interest is a mean score of multiple items, and the timing variables refer to how many days before or after the election each survey was completed by a participant (Germany and UK). In the US, all participants did the survey exactly seven days before the election, so that only the timing of the post-survey is controlled (most participants completed it seven days after the election, but responses were still permitted up to two days after that).

**Supplementary Table 1**

*Germany: Pre-Post comparison on Valence*

| Predictor          | $\beta$ | $b$   | SE   | $t$   | $p$   |
|--------------------|---------|-------|------|-------|-------|
| Time               | -.51    | -1.12 | 0.11 | -9.92 | <.001 |
| Political Interest | -.06    | -0.05 | 0.04 | -1.14 | .257  |
| Timing pre-survey  | -.15    | -0.5  | 0.08 | -0.59 | .554  |
| Timing post-survey | .33     | 0.10  | 0.08 | 1.13  | .196  |

**Supplementary Table 2**

*UK: Pre-Post comparison on Valence*

| Predictor          | $\beta$ | $b$   | SE   | $t$   | $p$   |
|--------------------|---------|-------|------|-------|-------|
| Time               | .34     | 1.02  | 0.21 | 4.92  | <.001 |
| Political Interest | .20     | 0.25  | 0.09 | 2.77  | .006  |
| Timing pre-survey  | .02     | 0.01  | 0.14 | 0.04  | .966  |
| Timing post-survey | -.11    | -0.04 | 0.14 | -0.28 | .779  |

**Supplementary Table 3**

*US: Pre-Post comparison on Valence*

| Predictor | $\beta$ | $b$ | SE | $t$ | $p$ |
|-----------|---------|-----|----|-----|-----|
|-----------|---------|-----|----|-----|-----|

|                    |      |       |      |       |      |
|--------------------|------|-------|------|-------|------|
| Time               | -.15 | -0.64 | 0.20 | -3.26 | .001 |
| Political Interest | .22  | 0.04  | 0.08 | 0.48  | .634 |
| Timing post-survey | .004 | 0.02  | 0.27 | 0.09  | .928 |

#### Supplementary Table 4

*Germany: Pre-Post comparison on Vividness*

| Predictor          | $\beta$ | $b$   | SE   | $t$   | $p$   |
|--------------------|---------|-------|------|-------|-------|
| Time               | .15     | 0.37  | 0.14 | 2.58  | .010  |
| Political Interest | .30     | 0.29  | 0.06 | 5.09  | <.001 |
| Timing pre-survey  | .76     | 0.28  | 0.10 | 2.75  | .006  |
| Timing post-survey | -.89    | -0.31 | 0.10 | -3.19 | .002  |

#### Supplementary Table 5

*UK: Pre-Post comparison on Vividness*

| Predictor          | $\beta$ | $b$   | SE   | $t$   | $p$   |
|--------------------|---------|-------|------|-------|-------|
| Time               | .28     | 0.80  | 0.20 | 4.09  | <.001 |
| Political Interest | .34     | 0.41  | 0.08 | 4.84  | <.001 |
| Timing pre-survey  | .37     | 0.13  | 0.13 | 0.99  | .321  |
| Timing post-survey | -.43    | -0.15 | 0.13 | -1.15 | .251  |

#### Supplementary Table 6

*US: Pre-Post comparison on Vividness*

| Predictor          | $\beta$ | $b$   | SE   | $t$   | $p$   |
|--------------------|---------|-------|------|-------|-------|
| Time               | .56     | 1.81  | 0.12 | 15.07 | <.001 |
| Political Interest | .25     | 0.33  | 0.05 | 6.86  | <.001 |
| Timing post-survey | -.08    | -0.38 | 0.17 | -2.29 | .023  |

#### Supplementary Table 7

*Germany: Pre-Post comparison on Importance*

| Predictor | $\beta$ | $b$ | SE | $t$ | $p$ |
|-----------|---------|-----|----|-----|-----|
|-----------|---------|-----|----|-----|-----|

|                    |      |       |      |       |       |
|--------------------|------|-------|------|-------|-------|
| Time               | .02  | 0.04  | 0.13 | 0.35  | .726  |
| Political Interest | .38  | 0.32  | 0.05 | 6.51  | <.001 |
| Timing pre-survey  | .17  | 0.06  | 0.09 | 0.63  | .528  |
| Timing post-survey | -.41 | -0.13 | 0.08 | -1.50 | .135  |

### Supplementary Table 8

*UK: Pre-Post comparison on Importance*

| Predictor          | $\beta$ | <i>b</i> | SE   | <i>t</i> | <i>p</i> |
|--------------------|---------|----------|------|----------|----------|
| Time               | .03     | 0.07     | 0.15 | 0.44     | .661     |
| Political Interest | .52     | 0.51     | 0.07 | 7.58     | <.001    |
| Timing pre-survey  | -.30    | -0.09    | 0.11 | -0.83    | .411     |
| Timing post-survey | .36     | 0.10     | 0.10 | 0.93     | .355     |

### Supplementary Table 9

*US: Pre-Post comparison on Importance*

| Predictor          | $\beta$ | <i>b</i> | SE   | <i>t</i> | <i>p</i> |
|--------------------|---------|----------|------|----------|----------|
| Time               | .004    | 0.01     | 0.08 | 0.10     | .917     |
| Political Interest | .46     | 0.37     | 0.03 | 11.16    | <.001    |
| Timing post-survey | -.05    | -0.14    | 0.12 | -1.22    | .223     |

### Supplementary Table 10

*Germany: Correlation between Changes in Valence and Vividness*

| Predictor          | $\beta$ | <i>b</i> | SE   | <i>t</i> | <i>p</i> |
|--------------------|---------|----------|------|----------|----------|
| Valence Change     | .04     | 0.05     | 0.11 | 0.42     | .677     |
| Political Interest | -.05    | -0.05    | 0.10 | -0.54    | .592     |
| Timing pre-survey  | -.45    | -0.20    | 0.19 | -1.07    | .285     |
| Timing post-survey | .43     | 0.17     | 0.17 | 0.99     | .322     |

### Supplementary Table 11

*Germany: Correlation between Changes in Valence and Importance*

| Predictor          | $\beta$ | $b$   | SE   | $t$   | $p$  |
|--------------------|---------|-------|------|-------|------|
| Valence Change     | .12     | 0.12  | 0.08 | 1.42  | .158 |
| Political Interest | -.07    | -0.06 | 0.07 | -0.85 | .399 |
| Timing pre-survey  | -.11    | -0.04 | 0.13 | -0.27 | .787 |
| Timing post-survey | -.19    | -0.06 | 0.12 | -0.45 | .651 |

**Supplementary Table 12***Germany: Correlation between Changes in Vividness and Importance*

| Predictor          | $\beta$ | $b$   | SE   | $t$   | $p$   |
|--------------------|---------|-------|------|-------|-------|
| Vividness Change   | .35     | 0.47  | 0.11 | 4.10  | <.001 |
| Political Interest | -.02    | -0.03 | 0.10 | -0.27 | .789  |
| Timing pre-survey  | -.41    | -0.18 | 0.17 | -1.04 | .299  |
| Timing post-survey | .49     | 0.20  | 0.16 | 1.22  | .224  |

**Supplementary Table 13***UK: Correlation between Changes in Valence and Vividness*

| Predictor          | $\beta$ | $b$   | SE   | $t$   | $p$   |
|--------------------|---------|-------|------|-------|-------|
| Valence Change     | .44     | 0.53  | 0.12 | 4.36  | <.001 |
| Political Interest | .18     | 0.23  | 0.14 | 1.70  | .092  |
| Timing pre-survey  | -.24    | -0.10 | 0.21 | -0.45 | .654  |
| Timing post-survey | .13     | 0.05  | 0.21 | 0.24  | .809  |

**Supplementary Table 14***UK: Correlation between Changes in Valence and Importance*

| Predictor          | $\beta$ | $b$   | SE   | $t$   | $p$  |
|--------------------|---------|-------|------|-------|------|
| Valence Change     | .10     | 0.07  | 0.08 | 0.94  | .350 |
| Political Interest | -.08    | -0.06 | 0.09 | -0.67 | .505 |
| Timing pre-survey  | -.30    | -0.07 | 0.14 | -0.50 | .621 |
| Timing post-survey | -.32    | 0.07  | 0.13 | 0.53  | .595 |

**Supplementary Table 15**

*UK: Correlation between Changes in Vividness and Importance*

| Predictor          | $\beta$ | $b$   | SE   | $t$   | $p$  |
|--------------------|---------|-------|------|-------|------|
| Vividness Change   | .35     | 0.17  | 0.06 | 2.78  | .007 |
| Political Interest | -.02    | -0.09 | 0.08 | -1.14 | .258 |
| Timing pre-survey  | -.41    | -0.05 | 0.13 | -0.41 | .686 |
| Timing post-survey | .49     | 0.06  | 0.13 | 0.50  | .621 |

**Supplementary Table 16***US: Correlation between Changes in Valence and Vividness*

| Predictor          | $\beta$ | $b$   | SE   | $t$   | $p$  |
|--------------------|---------|-------|------|-------|------|
| Valence Change     | .15     | 0.09  | 0.04 | 2.30  | .022 |
| Political Interest | -.09    | -0.12 | 0.09 | -1.35 | .180 |
| Timing post-survey | -.11    | -0.50 | 0.30 | -1.69 | .092 |

**Supplementary Table 17***US: Correlation between Changes in Valence and Importance*

| Predictor          | $\beta$ | $b$  | SE   | $t$   | $p$   |
|--------------------|---------|------|------|-------|-------|
| Valence Change     | .20     | 0.07 | 0.02 | 3.09  | .002  |
| Political Interest | -.13    | -.09 | 0.05 | -1.97 | .0499 |
| Timing post-survey | .03     | 0.08 | 0.16 | 0.50  | .620  |

**Supplementary Table 18***US: Correlation between Changes in Vividness and Importance*

| Predictor          | $\beta$ | $b$   | SE   | $t$   | $p$  |
|--------------------|---------|-------|------|-------|------|
| Vividness Change   | .07     | 0.04  | 0.03 | 1.06  | .293 |
| Political Interest | -.16    | -0.12 | 0.05 | -2.52 | .013 |
| Timing post-survey | .04     | 0.10  | 0.16 | 0.64  | .521 |

**Supplementary Table 19***Germany: Party identifications predicting Changes in Valence*

| Predictor    | $\beta$ | $b$   | SE   | $t$   | $p$  |
|--------------|---------|-------|------|-------|------|
| CDU          | .13     | 0.11  | 0.07 | 1.52  | .130 |
| FDP          | .12     | 0.12  | 0.08 | 1.45  | .149 |
| Freie Wähler | -.03    | -0.03 | 0.10 | -0.31 | .757 |
| Green        | -.15    | -0.12 | 0.07 | -1.66 | .100 |
| Left         | -.04    | -0.03 | 0.06 | -0.51 | .614 |
| SPD          | -.23    | -0.20 | 0.08 | -2.61 | .010 |
| Volt         | .02     | 0.01  | 0.06 | 0.19  | .851 |

### Supplementary Table 20

*Germany: Party identifications predicting Changes in Vividness*

| Predictor    | $\beta$ | $b$   | SE   | $t$   | $p$  |
|--------------|---------|-------|------|-------|------|
| CDU          | .02     | 0.02  | 0.10 | 0.19  | .851 |
| FDP          | .17     | 0.21  | 0.11 | 2.02  | .046 |
| Freie Wähler | .09     | 0.13  | 0.13 | 1.00  | .320 |
| Green        | -.11    | -0.11 | 0.09 | -1.12 | .267 |
| Left         | .07     | 0.06  | 0.08 | 0.73  | .467 |
| SPD          | -.07    | -0.08 | 0.11 | -0.80 | .424 |
| Volt         | -.08    | -0.07 | 0.07 | -0.89 | .374 |

### Supplementary Table 21

*Germany: Party identifications predicting Changes in Importance*

| Predictor    | $\beta$ | $b$   | SE   | $t$   | $p$  |
|--------------|---------|-------|------|-------|------|
| CDU          | -.07    | -0.06 | 0.07 | -0.79 | .433 |
| FDP          | -.07    | -0.06 | 0.08 | -0.81 | .418 |
| Freie Wähler | -.08    | -0.09 | 0.09 | -1.02 | .309 |
| Green        | -.14    | -0.10 | 0.07 | -1.55 | .124 |
| Left         | .04     | 0.03  | 0.06 | 0.44  | .663 |
| SPD          | -.19    | -0.17 | 0.07 | -2.26 | .026 |
| Volt         | .09     | 0.06  | 0.05 | 1.07  | .287 |

### Supplementary Table 22

*UK: Labour Favourability predicting Changes in Valence*

| Predictor            | $\beta$ | $b$   | SE   | $t$   | $p$   |
|----------------------|---------|-------|------|-------|-------|
| Labour Favourability | .01     | 0.01  | 0.14 | 0.08  | .938  |
| Political Interest   | -.22    | -0.24 | 0.12 | -1.99 | .0497 |
| Timing pre-survey    | .29     | 0.09  | 0.20 | 0.48  | .636  |
| Timing post-survey   | -.18    | -0.06 | 0.19 | -0.29 | .772  |

**Supplementary Table 23***UK: Labour Favourability predicting Changes in Vividness*

| Predictor            | $\beta$ | $b$   | SE   | $t$   | $p$  |
|----------------------|---------|-------|------|-------|------|
| Labour Favourability | .25     | 0.39  | 0.17 | 2.27  | .026 |
| Political Interest   | .06     | 0.08  | 0.14 | 0.67  | .572 |
| Timing pre-survey    | -.45    | -0.18 | 0.24 | -0.75 | .457 |
| Timing post-survey   | .38     | 0.15  | 0.23 | 0.63  | .532 |

**Supplementary Table 24***UK: Labour Favourability predicting Changes in Importance*

| Predictor            | $\beta$ | $b$   | SE   | $t$   | $p$  |
|----------------------|---------|-------|------|-------|------|
| Labour Favourability | .34     | 0.31  | 0.10 | 3.22  | .002 |
| Political Interest   | -.13    | -0.10 | 0.08 | -1.18 | .243 |
| Timing pre-survey    | -.73    | -0.17 | 0.13 | -1.25 | .216 |
| Timing post-survey   | .75     | 0.17  | 0.13 | 1.29  | .202 |

**Supplementary Table 25***US: Voting Behaviour predicting Changes in Valence*

| Predictor          | $\beta$ | $b$   | SE   | $t$   | $p$   |
|--------------------|---------|-------|------|-------|-------|
| Trump > Harris     | .86     | 4.88  | 0.18 | 27.58 | <.001 |
| Political Interest | -.12    | -0.27 | 0.07 | -3.81 | <.001 |
| Timing post-survey | .02     | 0.14  | 0.24 | 0.58  | .566  |

**Supplementary Table 26**



*US: Voting Behaviour predicting Changes in Vividness*

| Predictor          | $\beta$ | $b$   | SE   | $t$   | $p$  |
|--------------------|---------|-------|------|-------|------|
| Trump > Harris     | .07     | 0.25  | 0.23 | 1.10  | .274 |
| Political Interest | -.11    | -0.15 | 0.09 | -1.64 | .102 |
| Timing post-survey | -.09    | -0.43 | 0.31 | -1.37 | .172 |

**Supplementary Table 27***US: Voting Behaviour predicting Changes in Importance*

| Predictor          | $\beta$ | $b$   | SE   | $t$   | $p$  |
|--------------------|---------|-------|------|-------|------|
| Trump > Harris     | .19     | 0.35  | 0.12 | 3.03  | .003 |
| Political Interest | -.19    | -0.13 | 0.05 | -2.93 | .004 |
| Timing post-survey | .03     | 0.08  | 0.16 | 0.50  | .618 |

**Supplementary Table 28***US: Pre-Post Comparison on Fairness*

| Predictor          | $\beta$ | $b$   | SE   | $t$   | $p$   |
|--------------------|---------|-------|------|-------|-------|
| Time               | .19     | 0.63  | 0.16 | 4.03  | <.001 |
| Political Interest | .02     | 0.02  | 0.06 | 0.40  | .692  |
| Timing post-survey | -.06    | -0.27 | 0.22 | -1.25 | .213  |

**Supplementary Table 29***US: Voting Behaviour predicting Changes in Fairness*

| Predictor          | $\beta$ | $b$   | SE   | $t$   | $p$   |
|--------------------|---------|-------|------|-------|-------|
| Trump > Harris     | .60     | 2.74  | 0.25 | 11.15 | <.001 |
| Political Interest | -.05    | -0.10 | 0.10 | -1.01 | .316  |
| Timing post-survey | .01     | 0.09  | 0.34 | 0.26  | .794  |

**Supplementary Table 30***US: Changes between Memory for Prediction and Prediction itself in Valence*

| Predictor | $\beta$ | $b$ | SE | $t$ | $p$ |
|-----------|---------|-----|----|-----|-----|
|-----------|---------|-----|----|-----|-----|

|                     |       |       |      |       |       |
|---------------------|-------|-------|------|-------|-------|
| Memory > Prediction | .14   | 0.36  | 0.12 | 3.07  | .002  |
| Political Interest  | .22   | 0.22  | 0.05 | 4.78  | <.001 |
| Timing post-survey  | -.002 | -0.01 | 0.16 | -0.04 | .965  |

**Supplementary Table 31***US: Changes between Memory for Prediction and Prediction itself in Vividness*

| Predictor           | $\beta$ | <i>b</i> | SE   | <i>t</i> | <i>p</i> |
|---------------------|---------|----------|------|----------|----------|
| Memory > Prediction | .12     | 0.38     | 0.14 | 2.83     | .005     |
| Political Interest  | .31     | 0.37     | 0.05 | 6.93     | <.001    |
| Timing post-survey  | -.01    | -0.03    | 0.19 | -0.18    | .856     |

**Supplementary Table 32***US: Changes between Memory for Prediction and Prediction itself in Importance*

| Predictor           | $\beta$ | <i>b</i> | SE   | <i>t</i> | <i>p</i> |
|---------------------|---------|----------|------|----------|----------|
| Memory > Prediction | -0.01   | -0.02    | 0.08 | -0.21    | .835     |
| Political Interest  | .48     | 0.38     | 0.03 | 11.57    | <.001    |
| Timing post-survey  | -.06    | -0.16    | 0.12 | -1.40    | .164     |

**Supplementary Table 33***US: Changes between Memory for Prediction and Prediction itself in Hoped-for Outcome*

| Predictor           | $\beta$ | <i>b</i> | SE   | <i>t</i> | <i>p</i> |
|---------------------|---------|----------|------|----------|----------|
| Memory > Prediction | -0.002  | -0.01    | 0.27 | -0.05    | .961     |
| Political Interest  | -.09    | -0.20    | 0.11 | -1.85    | .065     |
| Timing post-survey  | -.01    | -0.11    | 0.37 | -0.29    | .776     |

**Supplementary Table 34***US: Changes between Memory for Prediction and Prediction itself in Expected Outcome*

| Predictor           | $\beta$ | <i>b</i> | SE   | <i>t</i> | <i>p</i> |
|---------------------|---------|----------|------|----------|----------|
| Memory > Prediction | -.12    | -0.43    | 0.17 | -2.63    | .009     |
| Political Interest  | -.06    | -0.09    | 0.07 | -1.35    | .178     |

|                    |      |       |      |       |      |
|--------------------|------|-------|------|-------|------|
| Timing post-survey | -.04 | -0.20 | 0.23 | -0.86 | .392 |
|--------------------|------|-------|------|-------|------|

**Supplementary Table 35***US: Changes between Memory for Prediction and Prediction itself in Fairness*

| Predictor           | $\beta$ | $b$   | SE   | $t$   | $p$  |
|---------------------|---------|-------|------|-------|------|
| Memory > Prediction | .13     | 0.39  | 0.14 | 2.73  | .007 |
| Political Interest  | .08     | 0.10  | 0.06 | 1.84  | .066 |
| Timing post-survey  | -.11    | -0.46 | 0.20 | -2.30 | .02  |

**Supplementary Table 36***US: Voting Behaviour predicting Memory for Prediction vs Memory changes in Valence*

| Predictor          | $\beta$ | $b$   | SE   | $t$   | $p$  |
|--------------------|---------|-------|------|-------|------|
| Trump > Harris     | -.15    | -0.39 | 0.17 | -2.32 | .021 |
| Political Interest | -.13    | -0.13 | 0.07 | -2.01 | .046 |
| Timing post-survey | -.01    | -0.05 | 0.23 | -0.21 | .837 |

**Supplementary Table 37***US: Voting Behaviour predicting Memory for Prediction vs Memory changes in Vividness*

| Predictor          | $\beta$ | $b$   | SE   | $t$   | $p$  |
|--------------------|---------|-------|------|-------|------|
| Trump > Harris     | -.003   | -0.01 | 0.21 | -0.06 | .956 |
| Political Interest | -.05    | -0.07 | 0.08 | -0.82 | .416 |
| Timing post-survey | .06     | 0.26  | 0.29 | 0.92  | .361 |

**Supplementary Table 38***US: Voting Behaviour predicting Memory for Prediction vs Memory changes in Importance*

| Predictor          | $\beta$ | $b$   | SE   | $t$   | $p$  |
|--------------------|---------|-------|------|-------|------|
| Trump > Harris     | .11     | 0.21  | 0.12 | 1.71  | .089 |
| Political Interest | -.16    | -0.12 | 0.05 | -2.43 | .016 |
| Timing post-survey | .01     | 0.04  | 0.17 | 0.22  | .824 |

**Supplementary Table 39**

*US: Voting Behaviour predicting Memory for Prediction vs Memory changes in Hoped-for Outcome*

| Predictor          | $\beta$ | $b$   | SE   | $t$   | $p$  |
|--------------------|---------|-------|------|-------|------|
| Trump > Harris     | .01     | 0.01  | 0.08 | 0.13  | .899 |
| Political Interest | .05     | 0.02  | 0.03 | 0.69  | .493 |
| Timing post-survey | -.09    | -0.15 | 0.11 | -1.40 | .163 |

**Supplementary Table 40**

*US: Voting Behaviour predicting Memory for Prediction vs Memory changes in Expected Outcome*

| Predictor          | $\beta$ | $b$   | SE   | $t$   | $p$  |
|--------------------|---------|-------|------|-------|------|
| Trump > Harris     | .07     | 0.18  | 0.16 | 1.12  | .262 |
| Political Interest | .01     | 0.01  | 0.06 | 0.18  | .860 |
| Timing post-survey | -.12    | -0.39 | 0.22 | -1.82 | .071 |

**Supplementary Table 41**

*US: Voting Behaviour predicting Memory for Prediction vs Memory changes in Fairness*

| Predictor          | $\beta$ | $b$   | SE   | $t$   | $p$  |
|--------------------|---------|-------|------|-------|------|
| Trump > Harris     | .15     | 0.45  | 0.19 | 2.30  | .022 |
| Political Interest | -.03    | -0.04 | 0.08 | -0.51 | .614 |
| Timing post-survey | -.08    | -0.34 | 0.27 | -1.29 | .198 |
